# Supplementary material for: Short Vestibular and Cognitive Training Improves Oral Reading Fluency in Children with Dyslexia
Source: MDPI journal article supplement (doi:10.3390/brainsci11111440), 2021-10-29
Supplement: s1 [file s1]

**Table S1:** Age (years) and number of words read in 1 min from each child tested three times (at T1, T2 and T3).

G1:

| Age  | T1  | T2  | T3  |
|------|-----|-----|-----|
| 9.1  | 61  | 73  | 78  |
| 9.11 | 24  | 31  | 28  |
| 9    | 88  | 91  | 91  |
| 9.11 | 21  | 37  | 39  |
| 8.6  | 25  | 37  | 55  |
| 9.2  | 52  | 70  | 71  |
| 9.4  | 30  | 35  | 28  |
| 10   | 94  | 113 | 103 |
| 9.11 | 40  | 57  | 58  |
| 11   | 108 | 144 | 147 |

G2:

| Age  | T1  | T2  | T3  |
|------|-----|-----|-----|
| 9.7  | 92  | 84  | 92  |
| 11   | 91  | 86  | 95  |
| 8    | 70  | 70  | 74  |
| 9.7  | 86  | 86  | 102 |
| 9.7  | 90  | 76  | 102 |
| 10.6 | 101 | 82  | 99  |
| 11   | 110 | 123 | 162 |
| 9.3  | 98  | 115 | 137 |
| 8.11 | 80  | 85  | 98  |
